# Supplementary material for: Molecular origins of the multi-donor strategy in inducing bathochromic shifts and enlarging Stokes shifts of fluorescent proteins
Source: Royal Society of Chemistry journal article supplement (doi:10.1039/d2cp00759b), 2022-01-01
Supplement: d2cp00759b1.pdf [file d2cp00759b1.pdf]

## Supplementary Information

### **Molecular origins of the multi-donor strategy in inducing bathochromic shifts and enlarging Stokes shifts of fluorescent proteins**

Xia Wu,<sup>a</sup> Davin Tan,<sup>a</sup> Qinglong Qiao,<sup>b</sup> Wenting Yin,<sup>b</sup> Zhaochao Xu,<sup>\*b</sup> Xiaogang Liu<sup>\*a</sup>

a. Fluorescence Research Group, Singapore University of Technology and Design, 8 Somapah Road, Singapore, 487372, Singapore; E-mail: xiaogang\_liu@sutd.edu.sg.

b. CAS Key Laboratory of Separation Science for Analytical Chemistry, Dalian Institute of Chemical Physics, Chinese Academy of Sciences, 457 Zhongshan Road, Dalian 116023, China; E-mail: zcxu@dicp.ac.cn

## Contents

|     |                                                                              |    |
|-----|------------------------------------------------------------------------------|----|
| 1.  | The Model of the $t$ index.....                                              | 3  |
| 2.  | Calculation results of small molecule fluorophores from references .....     | 4  |
| 3.  | Frontier molecular orbitals and electronic transitions of GFP analogues..... | 5  |
| 4.  | Calculation results of NGFP and NaYGFP using different functionals .....     | 6  |
| 5.  | Calculation results of NGFP and NaYGFP using different basis sets .....      | 8  |
| 6.  | Calculation results of NGFP and NaYGFP in different solvents .....           | 10 |
| 7.  | Calculation results of DeRed2 derivatives.....                               | 12 |
| 8.  | Calculation results of EGFP derivatives .....                                | 14 |
| 9.  | Calculation results of mOrange derivatives .....                             | 16 |
| 10. | Calculation results of HBR derivatives .....                                 | 18 |
| 11. | Calculation results of HPAR derivatives .....                                | 20 |
| 12. | References .....                                                             | 22 |

## 1. The Model of the $t$ index

$D_{CT}$  is defined as:

$$D_{CT} = |R_+ - R_-|$$

where the  $R_+$  and  $R_-$  refer to the centroid of the electron and hole, respectively.  $D_{CT}$  increases when the hole and electron become further separated.

$H$  index is defined by the relation:

$$H = \frac{|\sigma_{ele}| + |\sigma_{hole}|}{2}$$

where  $\sigma_{ele}$ ,  $\sigma_{hole}$  refer to the distribution breadth index of the electron and the hole, respectively .

When the  $H$  index becomes larger, the average extension of the hole and the electron in charge transfer direction gets larger.

The  $t$  index represents the difference between  $D_{CT}$  and  $H$ :

$$t = D_{CT} - H$$

whereby a larger  $t$  index corresponds to a higher degree of ICT.<sup>1,2</sup>

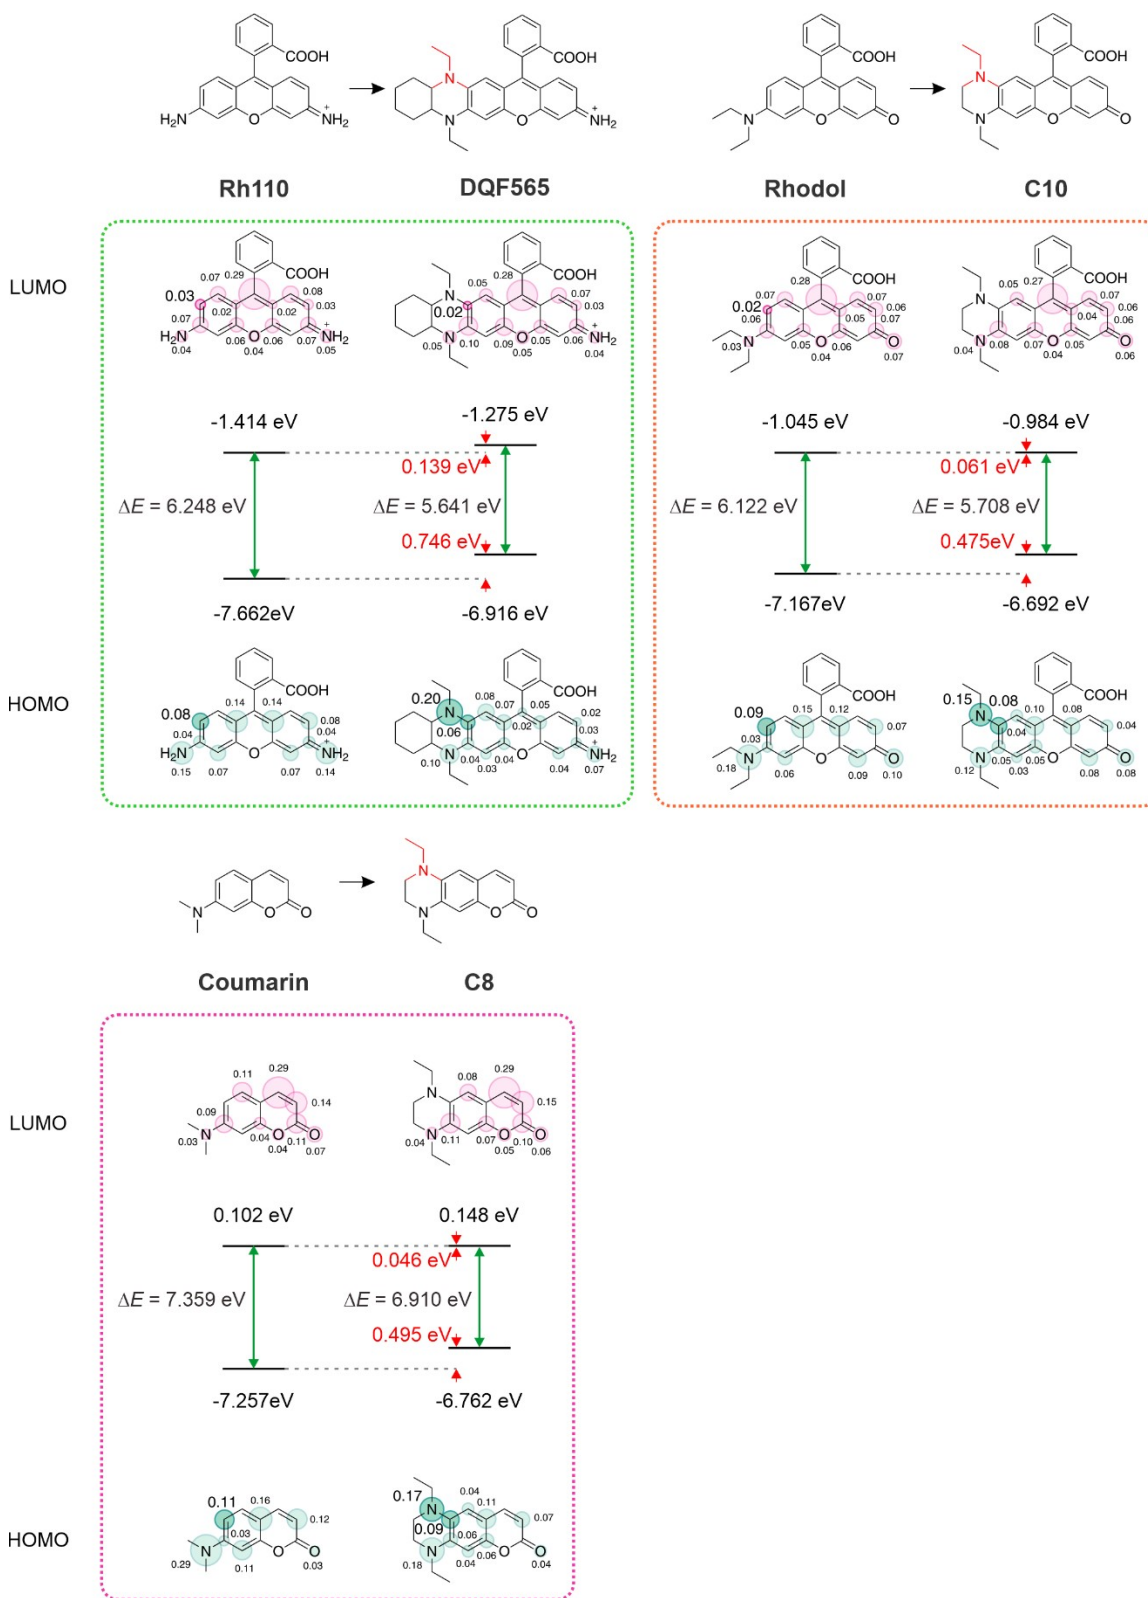

Fig. S1 The energy levels of HOMO and LUMO and the corresponding electronic gaps ( $\Delta E$ ) of small molecule fluorophores based on the multi-donor strategy in water.

Table S1. Calculated/experimental peak UV-vis absorption wavelength ( $\lambda_{\text{abs}}$ ), peak emission wavelength ( $\lambda_{\text{em}}$ ), Stokes shift ( $\Delta\lambda$ ), oscillator strength ( $f$ ), and  $t$ -index of small molecule fluorophores based on the multi-donor strategy in water.

| Fluorophore | $\lambda_{\text{abs}}$ (nm) | $\lambda_{\text{abs}}$ (Exp) (nm) | $\lambda_{\text{em}}$ (nm) | $\lambda_{\text{em}}$ (Exp) (nm) | $\Delta\lambda$ (nm) | $\Delta\lambda$ (Exp) (nm) | $f$    | $t$ index ( $\text{\AA}$ ) |
|-------------|-----------------------------|-----------------------------------|----------------------------|----------------------------------|----------------------|----------------------------|--------|----------------------------|
| Rh110       | 392                         | 564 <sup>[a]</sup>                | 413                        | 587 <sup>[a]</sup>               | 21                   | 23 <sup>[a]</sup>          | 0.7215 | -1.219                     |
| DQF565      | 482                         | 593 <sup>[a]</sup>                | 597                        | 653 <sup>[a]</sup>               | 115                  | 60 <sup>[a]</sup>          | 0.3419 | -0.858                     |
| Rhodol      | 405                         | 520 <sup>[b]</sup>                | 446                        | 550 <sup>[b]</sup>               | 41                   | 30 <sup>[b]</sup>          | 0.7728 | -1.460                     |
| C10         | 461                         | 520 <sup>[c]</sup>                | 583                        | 666 <sup>[c]</sup>               | 122                  | 146 <sup>[c]</sup>         | 0.3850 | -1.206                     |
| Coumarin    | 317                         | 373 <sup>[d]</sup>                | 352                        | 446 <sup>[d]</sup>               | 35                   | 73 <sup>[d]</sup>          | 0.5721 | -0.655                     |
| C8          | 354                         | 410 <sup>[e]</sup>                | 454                        | 552 <sup>[e]</sup>               | 100                  | 142 <sup>[e]</sup>         | 0.2443 | -0.014                     |

<sup>[a]</sup>Experiments data are extracted from literature.<sup>3</sup>

<sup>[b]</sup>Experiments data are extracted from literature.<sup>4</sup>

<sup>[c]</sup>Experiments data are extracted from literature.<sup>5</sup>

<sup>[d]</sup>Experiments data are extracted from literature.<sup>6</sup>

<sup>[e]</sup>Experiments data are extracted from literature.<sup>7</sup>

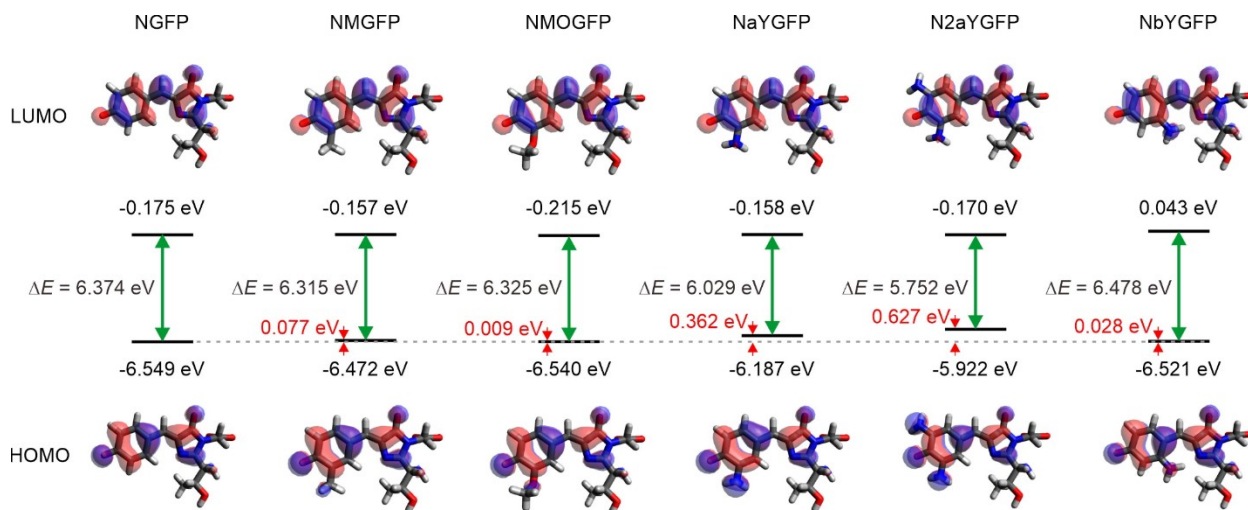

Fig. S2 Frontier molecular orbitals and electronic transitions of the NGFP analogues.

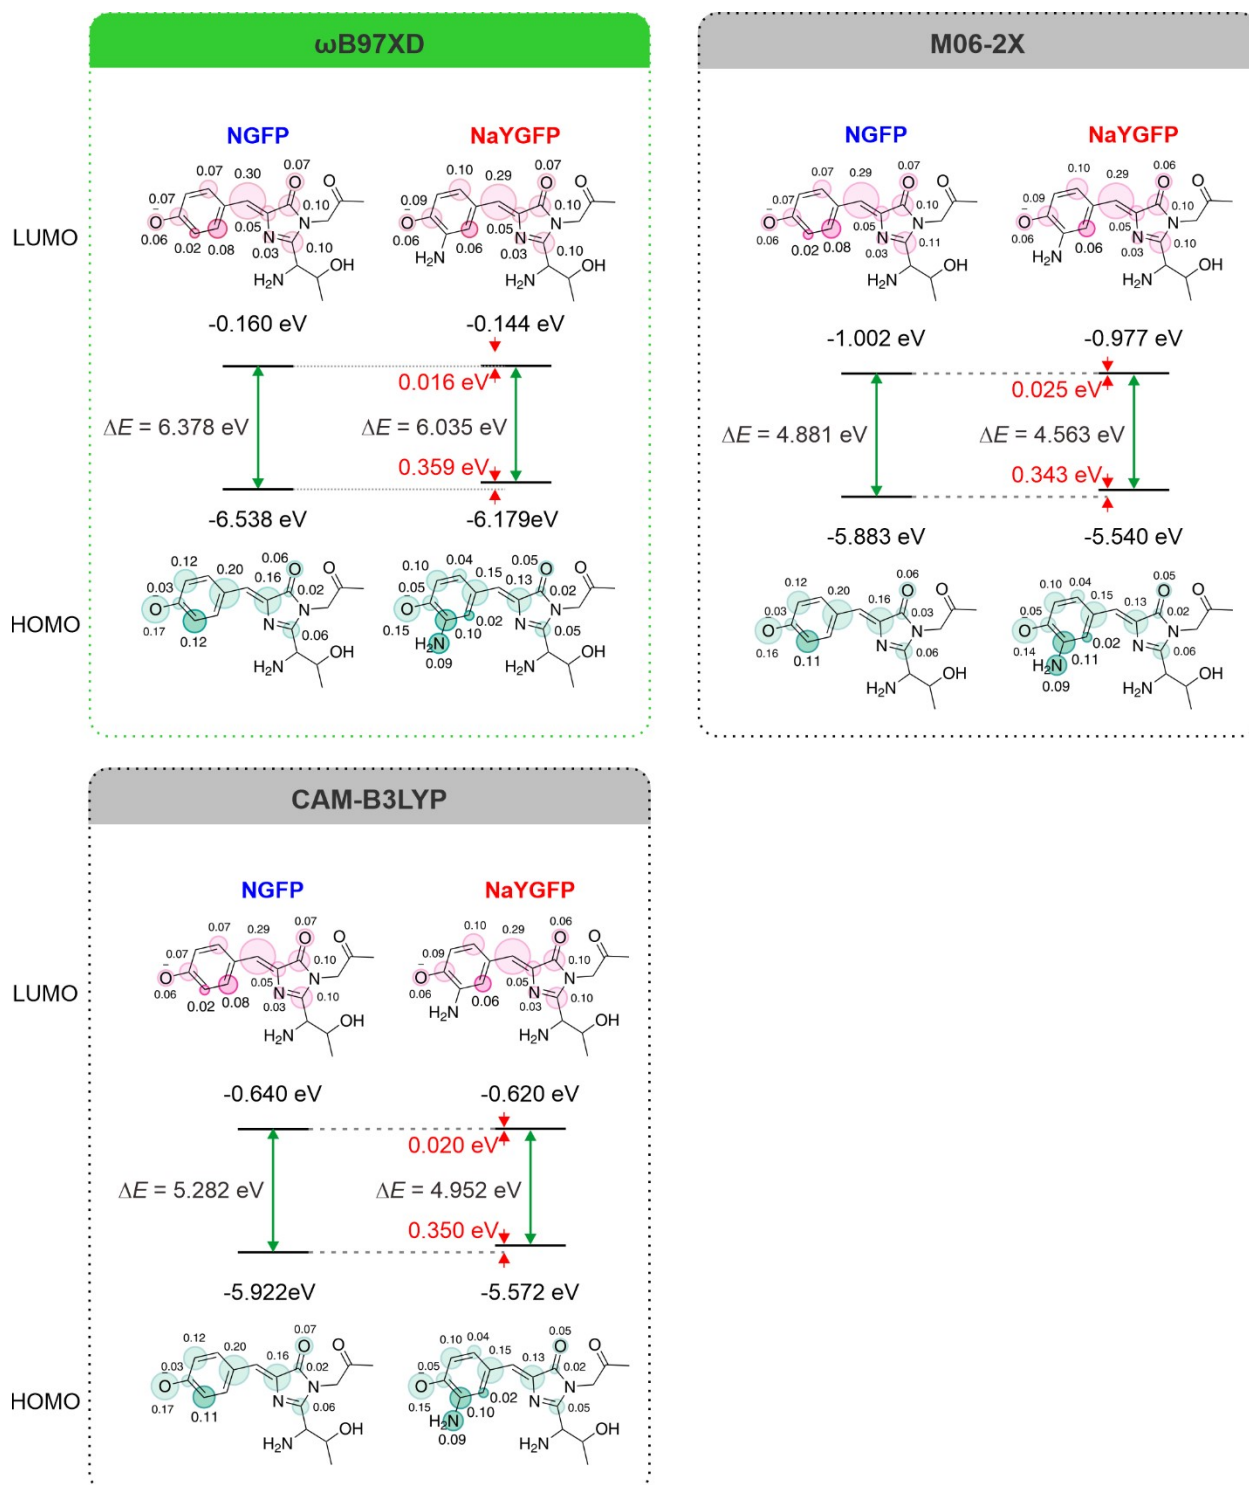

Fig. S3 The energy levels of HOMO and LUMO and the corresponding electronic gaps ( $\Delta E$ ) of NGFP and NaYGFP calculated using different functionals with the Def2svp basis set in water.

Table S2. Calculated peak UV-vis absorption wavelength ( $\lambda_{\text{abs}}$ ), peak emission wavelength ( $\lambda_{\text{em}}$ ), Stokes shift ( $\Delta\lambda$ ), oscillator strength ( $f$ ), and  $t$ -index of the NGFP and NaYGFP using different functionals with the Def2svp basis set in water.

| Functional     | NGFP                           |                               |                         |        |                  | NaYGFP                         |                               |                         |        |                  |
|----------------|--------------------------------|-------------------------------|-------------------------|--------|------------------|--------------------------------|-------------------------------|-------------------------|--------|------------------|
|                | $\lambda_{\text{abs}}$<br>(nm) | $\lambda_{\text{em}}$<br>(nm) | $\Delta\lambda$<br>(nm) | $f$    | $t$ index<br>(Å) | $\lambda_{\text{abs}}$<br>(nm) | $\lambda_{\text{em}}$<br>(nm) | $\Delta\lambda$<br>(nm) | $f$    | $t$ index<br>(Å) |
| CAM-B3LYP      | 371                            | 398                           | 27                      | 0.9965 | -1.987           | 398                            | 469                           | 71                      | 0.6246 | -0.996           |
| M06-2X         | 376                            | 403                           | 27                      | 0.9798 | -2.001           | 401                            | 465                           | 64                      | 0.6740 | -0.910           |
| $\omega$ B97XD | 371                            | 400                           | 30                      | 0.9810 | -1.933           | 398                            | 474                           | 76                      | 0.6093 | -0.868           |

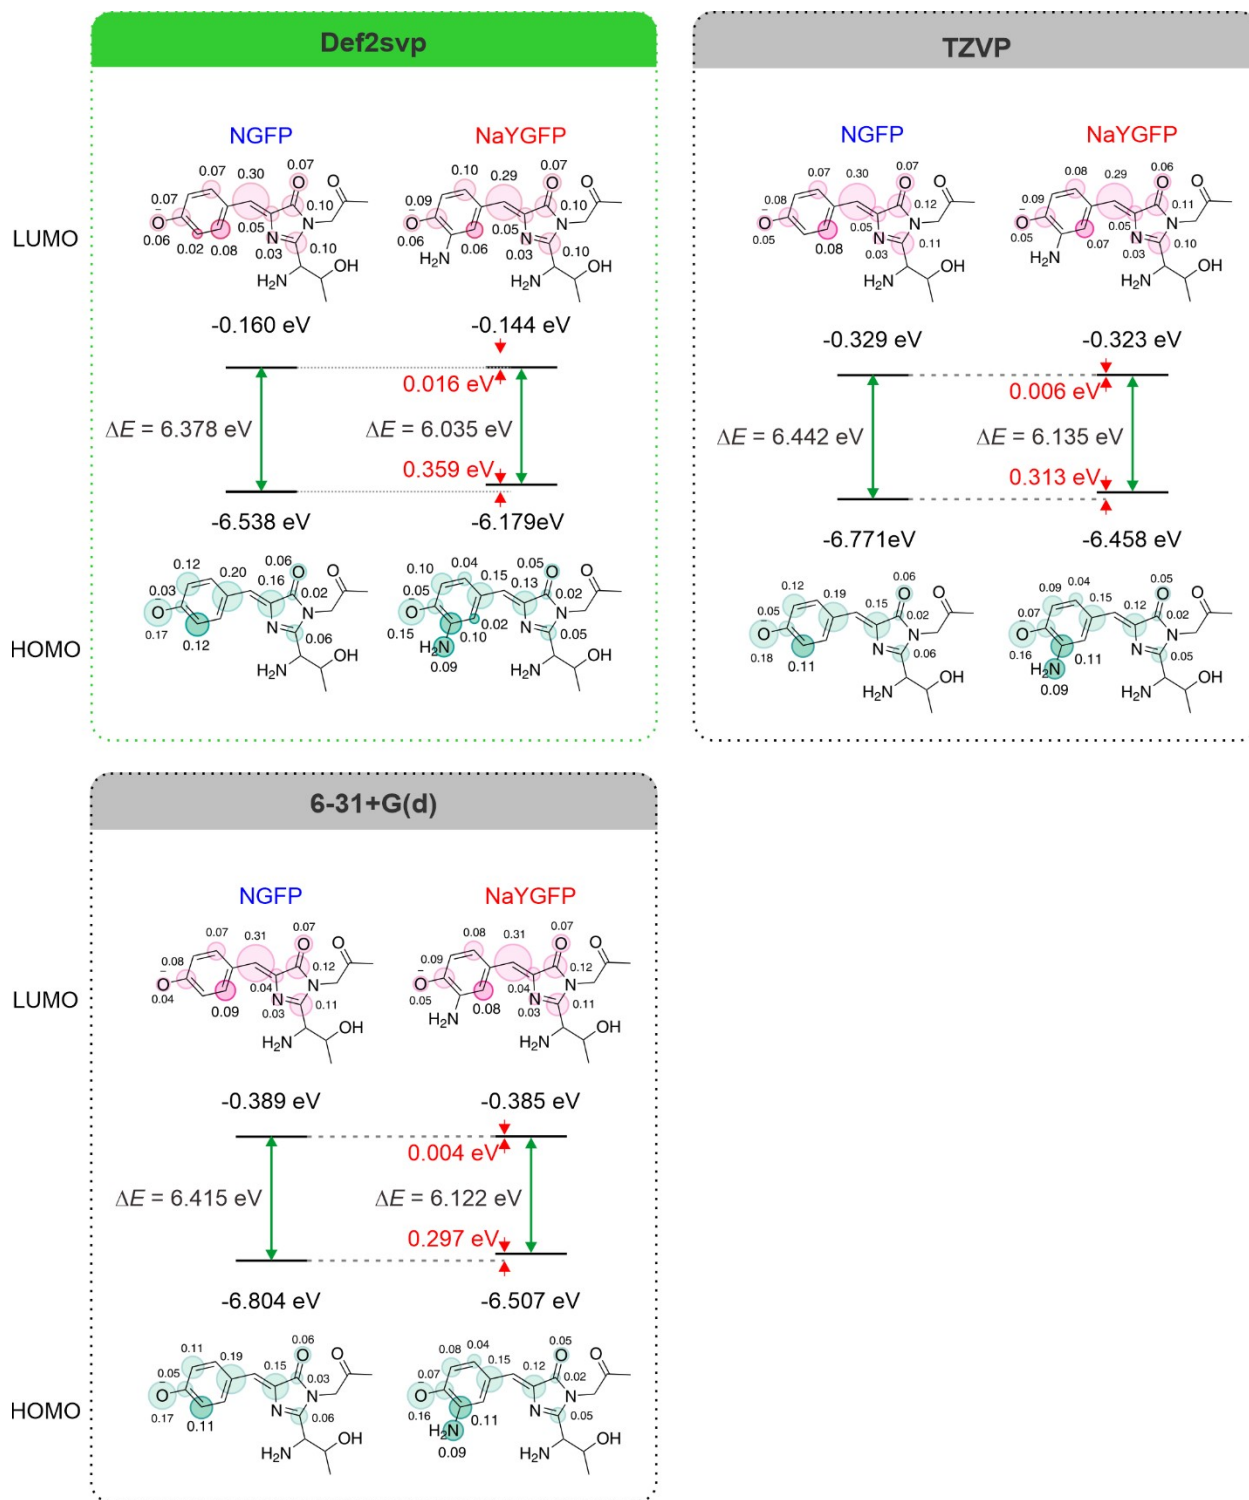

Fig. S4 The energy levels of HOMO and LUMO and the corresponding electronic gaps ( $\Delta E$ ) of NGFP and NaYGFP calculated using different basis sets with the  $\omega$ B97XD functional in water.



Table S3. Calculated peak UV-vis absorption wavelength ( $\lambda_{\text{abs}}$ ), peak emission wavelength ( $\lambda_{\text{em}}$ ), Stokes shift ( $\Delta\lambda$ ), oscillator strength ( $f$ ), and  $t$ -index of the NGFP and NaYGFP using different basis sets with the  $\omega$ B97XD functional in water.

| Basis set | NGFP                           |                               |                         |        |                               | NaYGFP                         |                               |                         |        |                               |
|-----------|--------------------------------|-------------------------------|-------------------------|--------|-------------------------------|--------------------------------|-------------------------------|-------------------------|--------|-------------------------------|
|           | $\lambda_{\text{abs}}$<br>(nm) | $\lambda_{\text{em}}$<br>(nm) | $\Delta\lambda$<br>(nm) | $f$    | $t$ index<br>( $\text{\AA}$ ) | $\lambda_{\text{abs}}$<br>(nm) | $\lambda_{\text{em}}$<br>(nm) | $\Delta\lambda$<br>(nm) | $f$    | $t$ index<br>( $\text{\AA}$ ) |
| 6-31+G(d) | 377                            | 412                           | 35                      | 0.9792 | -1.883                        | 400                            | 459                           | 59                      | 0.7795 | -1.054                        |
| TZVP      | 373                            | 408                           | 35                      | 0.9635 | -1.905                        | 397                            | 466                           | 69                      | 0.6996 | -1.013                        |
| Def2svp   | 371                            | 400                           | 30                      | 0.9810 | -1.933                        | 398                            | 474                           | 76                      | 0.6093 | -0.868                        |

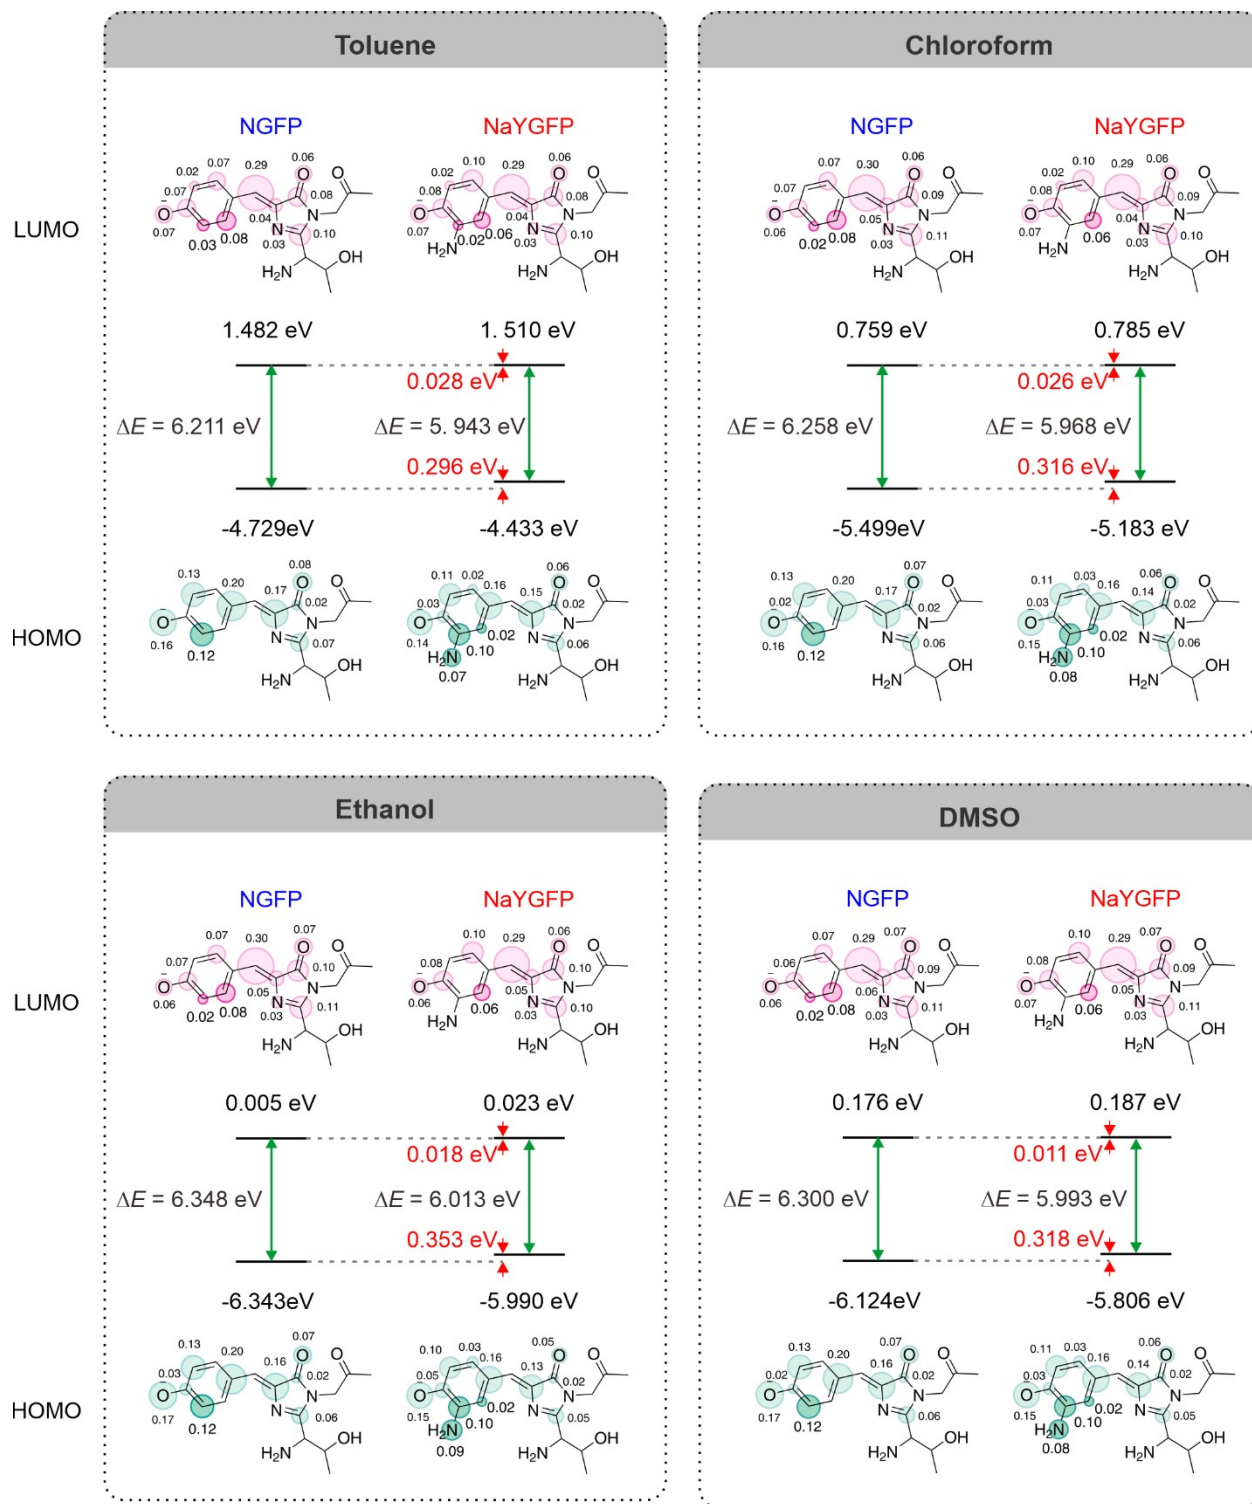

Fig. S5 The energy levels of HOMO and LUMO and the corresponding electronic gaps ( $\Delta E$ ) of NGFP and NaYGFP in different solvents. Note that we employed the deprotonated phenol groups in all these calculations, to focus on the impact of the solvent polarity on the spectral shifts. The protonation-deprotonation equilibrium could also affect the fluorescence properties of these fluorophores. However, this discussion is beyond the scope of our current manuscript.

Table S4. Calculated peak UV-vis absorption wavelength ( $\lambda_{\text{abs}}$ ), peak emission wavelength ( $\lambda_{\text{em}}$ ), Stokes shift ( $\Delta\lambda$ ), oscillator strength ( $f$ ), and  $t$ -index of the NGFP and NaYGFP in different solvents.

| Solvent    | NGFP                           |                               |                         |        |                  | NaYGFP                         |                               |                         |        |                  |
|------------|--------------------------------|-------------------------------|-------------------------|--------|------------------|--------------------------------|-------------------------------|-------------------------|--------|------------------|
|            | $\lambda_{\text{abs}}$<br>(nm) | $\lambda_{\text{em}}$<br>(nm) | $\Delta\lambda$<br>(nm) | $f$    | $t$ index<br>(Å) | $\lambda_{\text{abs}}$<br>(nm) | $\lambda_{\text{em}}$<br>(nm) | $\Delta\lambda$<br>(nm) | $f$    | $t$ index<br>(Å) |
| Toluene    | 383                            | 406                           | 23                      | 0.9927 | -1.95            | 405                            | 444                           | 39                      | 0.8472 | -1.140           |
| Chloroform | 379                            | 405                           | 26                      | 0.9906 | -1.953           | 403                            | 448                           | 45                      | 0.8060 | -1.117           |
| Ethanol    | 373                            | 402                           | 29                      | 0.9826 | -1.931           | 400                            | 467                           | 67                      | 0.6653 | -1.025           |
| DMSO       | 376                            | 405                           | 29                      | 0.9808 | -1.975           | 400                            | 457                           | 57                      | 0.7699 | -1.160           |
| Water      | 371                            | 400                           | 30                      | 0.9810 | -1.933           | 398                            | 474                           | 76                      | 0.6093 | -0.868           |

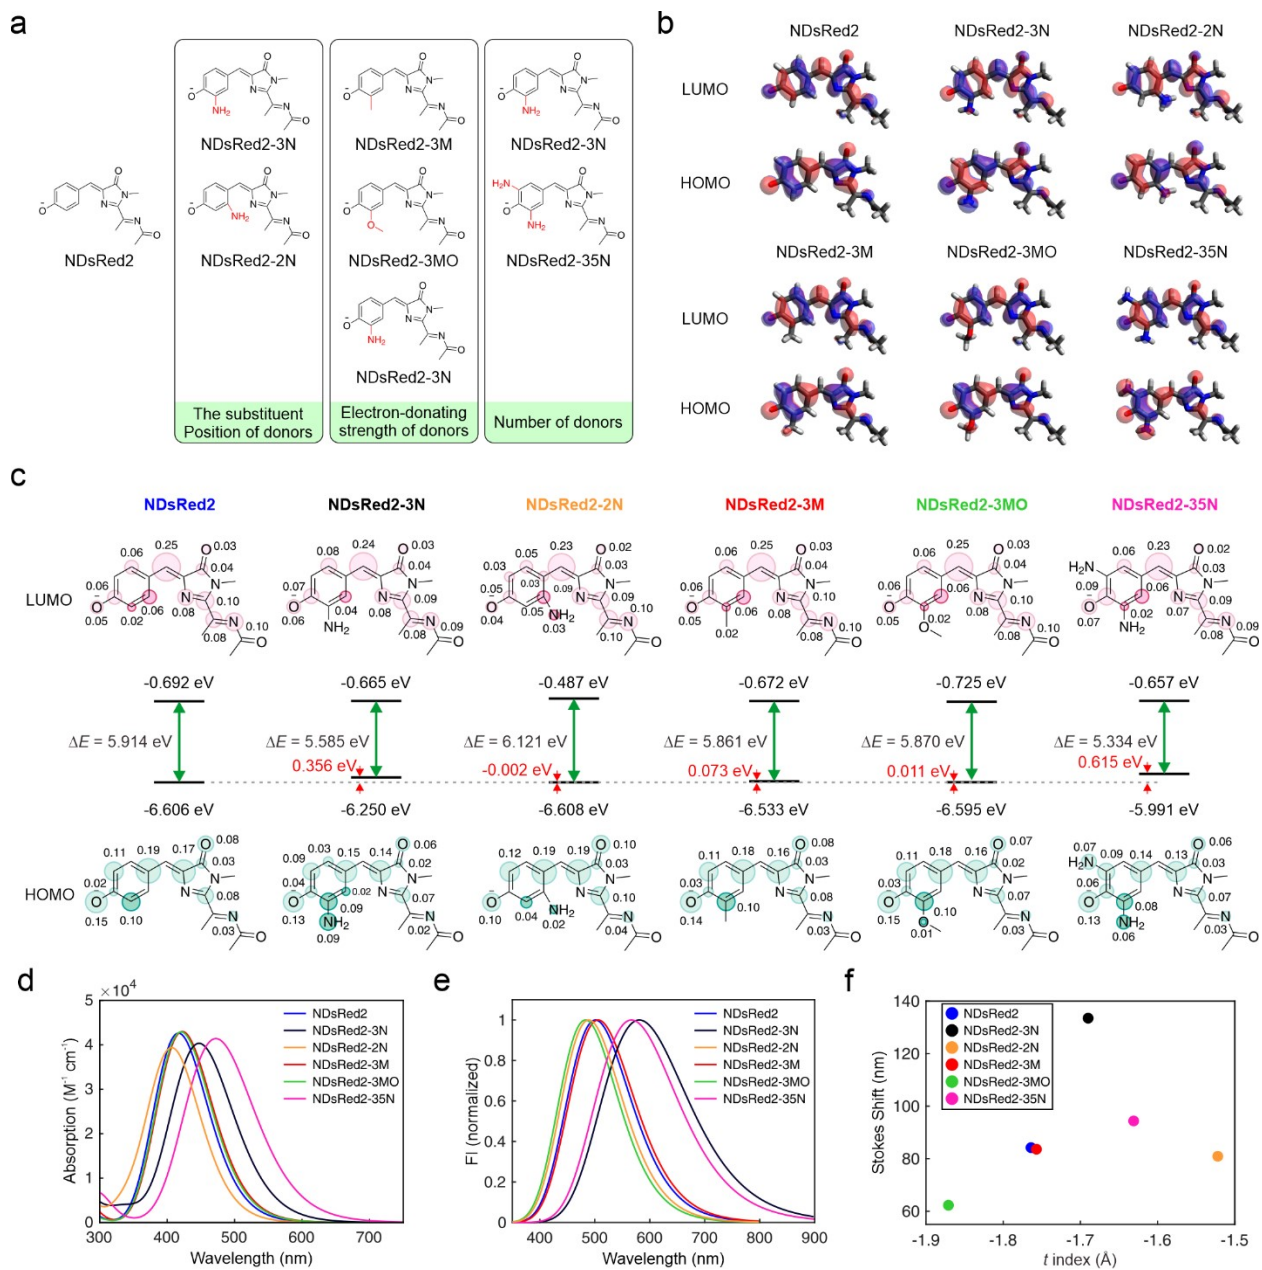

Fig. S6 (a) Chemical structures and (b) atomic contributions to the charge density distributions in the LUMO and HOMO and (c) the energy levels of HOMO and LUMO and the corresponding electronic gaps ( $\Delta E$ ), calculated (d) UV-vis absorption, (e) normalized emission spectra, and (f) the Stokes shifts as a function of the  $t$  index in the DeRed2 analogues in water.

Table S5. Calculated/experimental peak UV-vis absorption wavelength ( $\lambda_{\text{abs}}$ ), peak emission wavelength ( $\lambda_{\text{em}}$ ), Stokes shift ( $\Delta\lambda$ ), oscillator strength ( $f$ ), and  $t$ -index of the DeRed2 fluorophore analogues in water.

| Fluorophore analogues | $\lambda_{\text{abs}}$ (nm) | $\lambda_{\text{abs}}$ (nm) <sup>a)</sup> | $\lambda_{\text{em}}$ (nm) | $\lambda_{\text{em}}$ (nm) <sup>a)</sup> | SS (nm) | SS (nm) <sup>a)</sup> | $f$    | $t$ index (Å) |
|-----------------------|-----------------------------|-------------------------------------------|----------------------------|------------------------------------------|---------|-----------------------|--------|---------------|
| NDsRed2               | 417                         | 561                                       | 501                        | 587                                      | 84      | 26                    | 1.0302 | -1.764        |
| NDsRed2-3M            | 423                         |                                           | 506                        |                                          | 83      |                       | 1.0357 | -1.757        |
| NDsRed2-3MO           | 421                         |                                           | 483                        |                                          | 62      |                       | 1.0235 | -1.871        |
| NDsRed2-3N            | 447                         |                                           | 581                        |                                          | 134     |                       | 0.7567 | -1.690        |
| NDsRed2-35N           | 472                         |                                           | 567                        |                                          | 95      |                       | 1.0108 | -1.631        |
| NDsRed2-2N            | 408                         |                                           | 489                        |                                          | 81      |                       | 0.9991 | -1.522        |

<sup>a)</sup> Experimental data derived from previous works.<sup>8</sup>

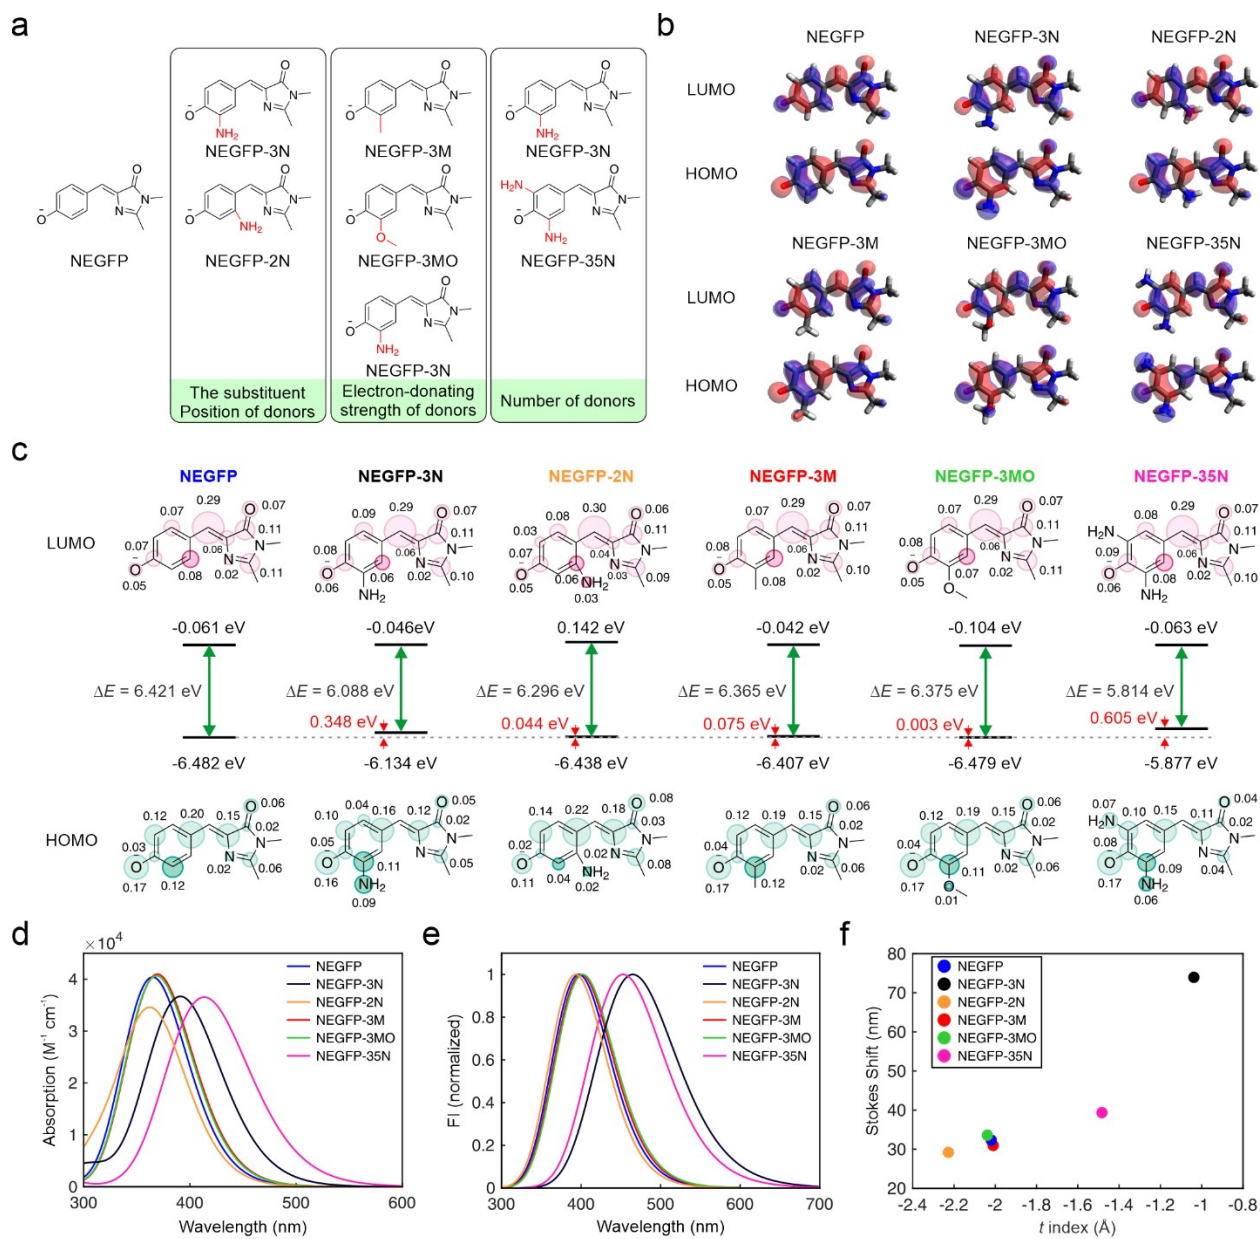

Fig. S7 (a) Chemical structures and (b) atomic contributions to the charge density distributions in the LUMO and HOMO and (c) the energy levels of HOMO and LUMO and the corresponding electronic gaps ( $\Delta E$ ), calculated (d) UV-vis absorption, (e) normalized emission spectra, and (f) the Stokes shifts as a function of the  $t$  index in the EGFP analogues in water.

Table S6. Calculated/experimental peak UV-vis absorption wavelength ( $\lambda_{\text{abs}}$ ), peak emission wavelength ( $\lambda_{\text{em}}$ ), Stokes shift ( $\Delta\lambda$ ), oscillator strength ( $f$ ), and  $t$ -index of the EGFP fluorophore analogues in water.

| Fluorophore analogues | $\lambda_{\text{abs}}$ (nm) | $\lambda_{\text{abs}}$ (nm) <sup>a)</sup> | $\lambda_{\text{em}}$ (nm) | $\lambda_{\text{em}}$ (nm) <sup>a)</sup> | SS (nm) | SS (nm) <sup>a)</sup> | $f$    | $t$ index (Å) |
|-----------------------|-----------------------------|-------------------------------------------|----------------------------|------------------------------------------|---------|-----------------------|--------|---------------|
| NEGFP                 | 365                         | 488                                       | 397                        | 507                                      | 32      | 19                    | 0.9701 | -2.019        |
| NEGFP-3M              | 369                         |                                           | 400                        |                                          | 31      |                       | 0.9883 | -2.010        |
| NEGFP-3MO             | 369                         |                                           | 402                        |                                          | 33      |                       | 0.9911 | -2.038        |
| NEGFP-3N              | 391                         |                                           | 465                        |                                          | 74      |                       | 0.6192 | -1.038        |
| NEGFP-35N             | 414                         |                                           | 453                        |                                          | 39      |                       | 0.8683 | -1.483        |
| NEGFP-2N              | 364                         |                                           | 393                        |                                          | 29      |                       | 0.7977 | -2.227        |

<sup>a)</sup> Experimental data derived from previous works.<sup>8</sup>

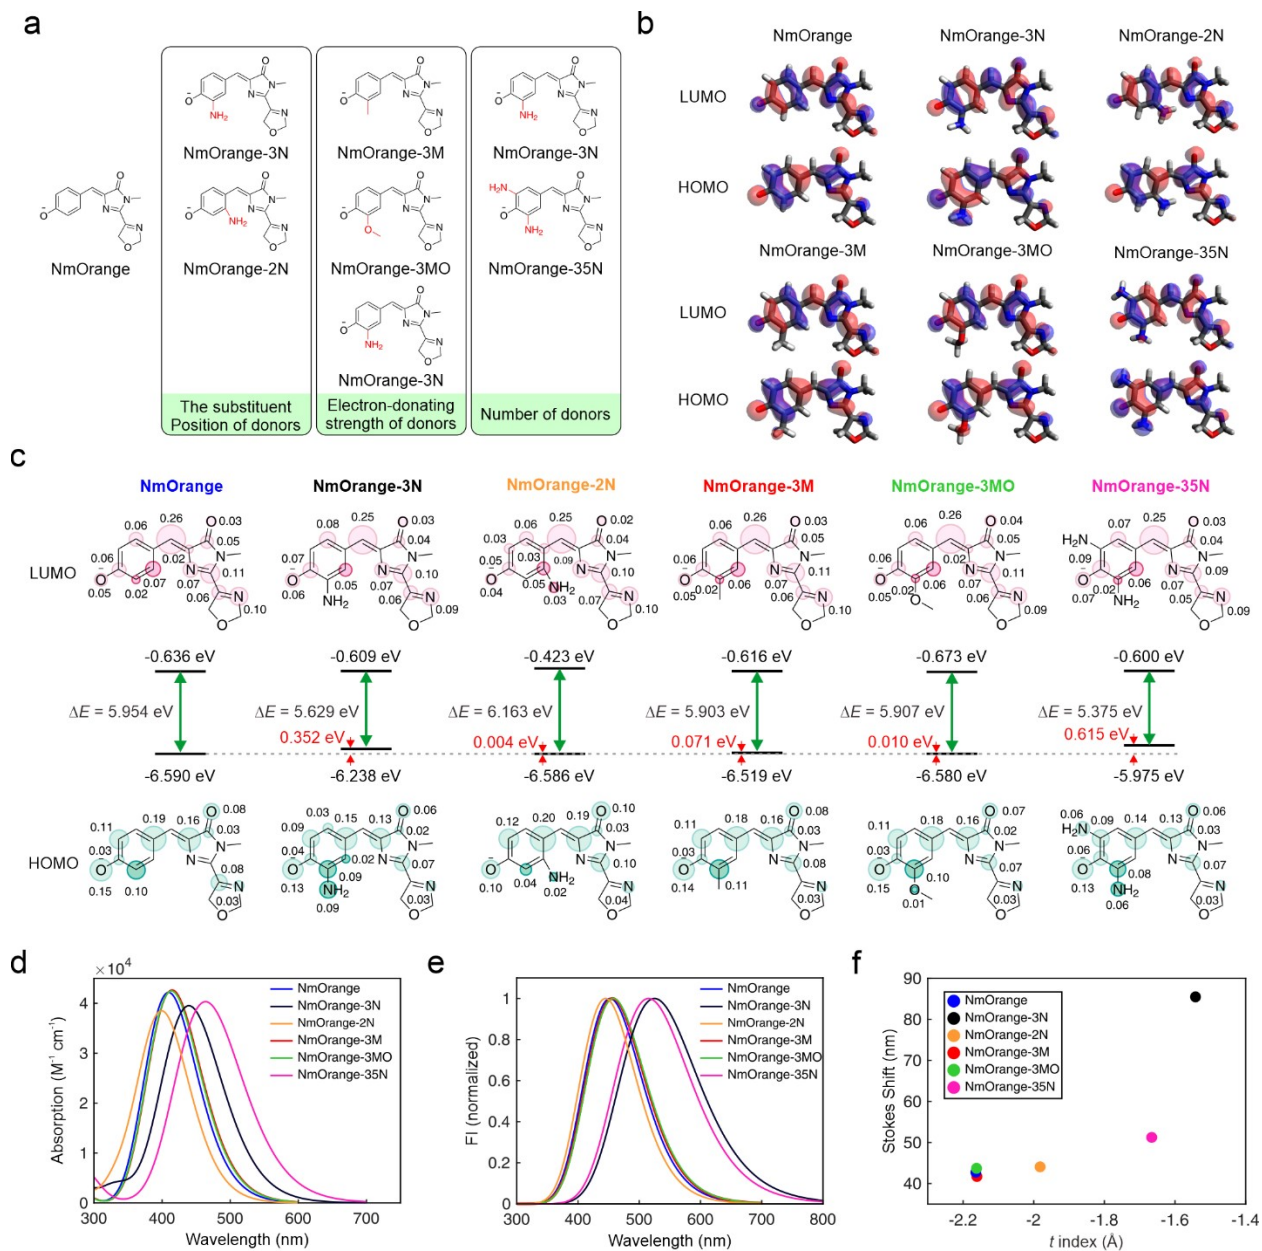

Fig. S8 (a) Chemical structures and (b) atomic contributions to the charge density distributions in the LUMO and HOMO and (c) the energy levels of HOMO and LUMO and the corresponding electronic gaps ( $\Delta E$ ), calculated (d) UV-vis absorption, (e) normalized emission spectra, and (f) the Stokes shifts as a function of the  $t$  index in the mOrange analogues in water.



Table S7. Calculated/experimental peak UV-vis absorption wavelength ( $\lambda_{\text{abs}}$ ), peak emission wavelength ( $\lambda_{\text{em}}$ ), Stokes shift ( $\Delta\lambda$ ), oscillator strength ( $f$ ), and  $t$ -index of the mOrange fluorophore analogues in water.

| Fluorophore analogues | $\lambda_{\text{abs}}$ (nm) | $\lambda_{\text{abs}}$ (nm) <sup>a)</sup> | $\lambda_{\text{em}}$ (nm) | $\lambda_{\text{em}}$ (nm) <sup>a)</sup> | SS (nm) | SS (nm) <sup>a)</sup> | $f$    | $t$ index (Å) |
|-----------------------|-----------------------------|-------------------------------------------|----------------------------|------------------------------------------|---------|-----------------------|--------|---------------|
| NmOrange              | 410                         | 546                                       | 452                        | 562                                      | 42      | 16                    | 0.9975 | -2.164        |
| NmOrange-3M           | 415                         |                                           | 456                        |                                          | 41      |                       | 1.0075 | -2.161        |
| NmOrange-3MO          | 414                         |                                           | 457                        |                                          | 43      |                       | 1.0123 | -2.162        |
| NmOrange-3N           | 439                         |                                           | 525                        |                                          | 86      |                       | 0.6891 | -1.542        |
| NmOrange-35N          | 464                         |                                           | 515                        |                                          | 51      |                       | 0.9094 | -1.666        |
| NmOrange-2N           | 401                         |                                           | 445                        |                                          | 44      |                       | 0.9108 | -1.982        |

<sup>a)</sup> Experimental data derived from previous works.<sup>8</sup>

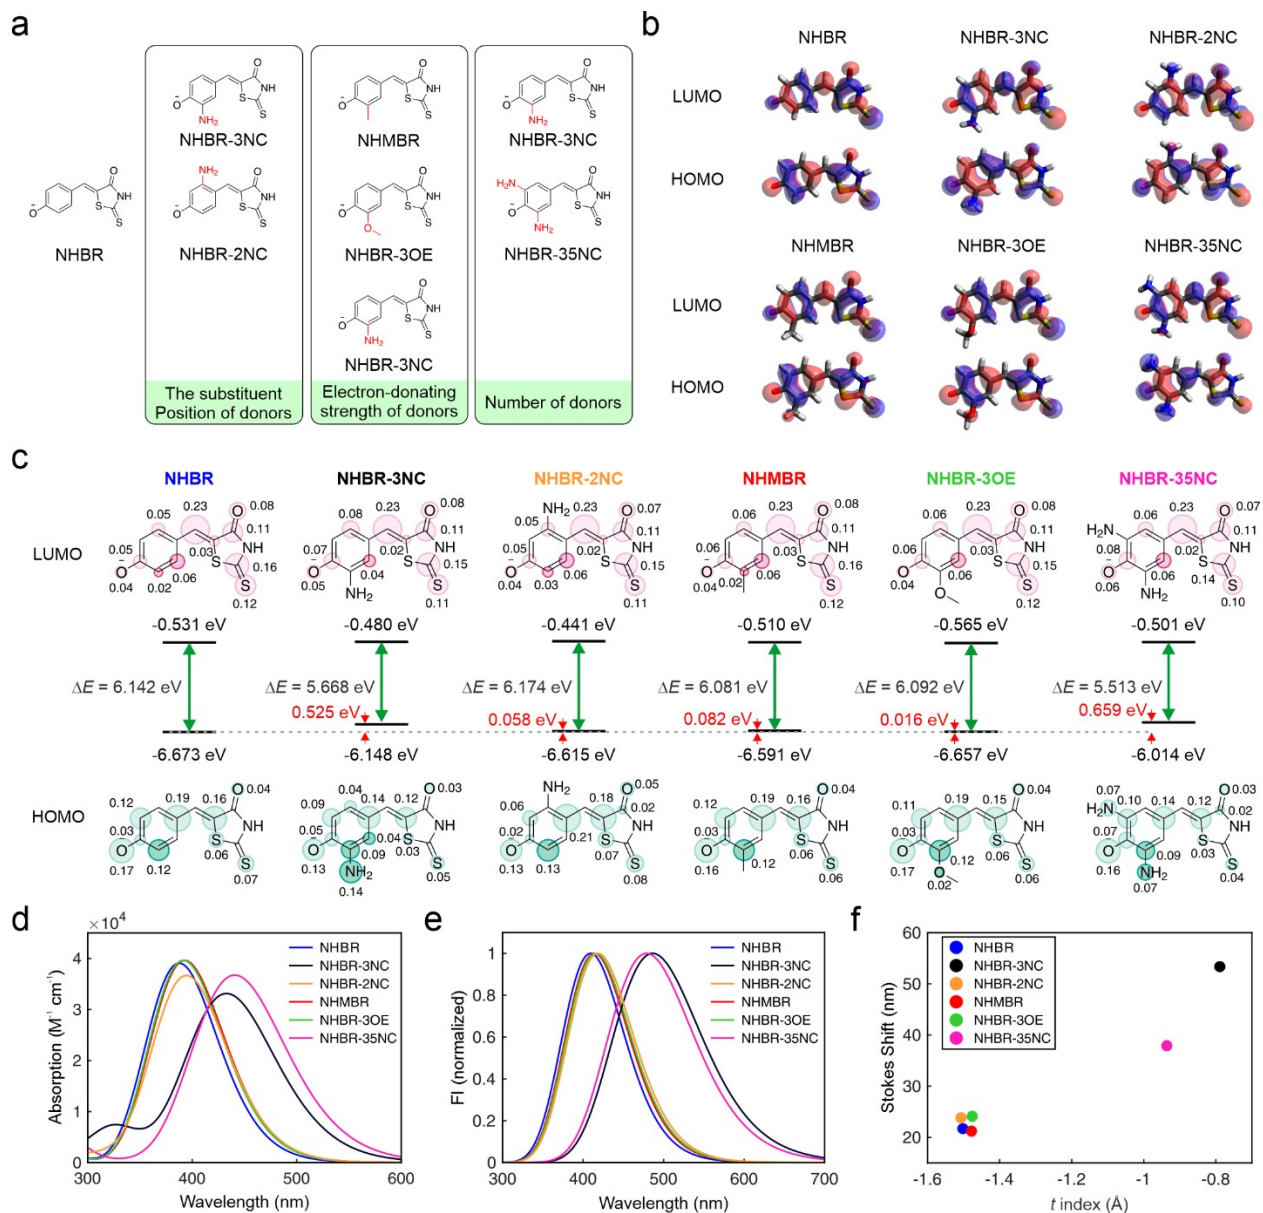

Fig. S9 (a) Chemical structures and (b) atomic contributions to the charge density distributions in the LUMO and HOMO and (c) the energy levels of HOMO and LUMO and the corresponding electronic gaps ( $\Delta E$ ), calculated (d) UV-vis absorption, (e) normalized emission spectra, and (f) the Stokes shifts as a function of the  $t$  index in the HBR analogues in water.

Table S8. Calculated/experimental peak UV-vis absorption wavelength ( $\lambda_{\text{abs}}$ ), peak emission wavelength ( $\lambda_{\text{em}}$ ), Stokes shift ( $\Delta\lambda$ ), oscillator strength ( $f$ ), and  $t$ -index of the HBR fluorophore analogues in water.

| Fluorophore analogues | $\lambda_{\text{abs}}$ (nm) | $\lambda_{\text{abs}}$ (nm) <sup>a)</sup> | $\lambda_{\text{em}}$ (nm) | $\lambda_{\text{em}}$ (nm) <sup>a)</sup> | SS (nm) | SS (nm) <sup>a)</sup> | $f$    | $t$ index (Å) |
|-----------------------|-----------------------------|-------------------------------------------|----------------------------|------------------------------------------|---------|-----------------------|--------|---------------|
| NHBR                  | 388                         |                                           | 409                        |                                          | 21      |                       | 0.9665 | -1.502        |
| NHMBR                 | 393                         | 481                                       | 414                        | 540                                      | 21      | 59                    | 0.9776 | -1.478        |
| NHBR-3OE              | 392                         | 497                                       | 416                        | 562                                      | 24      | 65                    | 0.9916 | -1.476        |
| NHBR-3NC              | 433                         |                                           | 486                        |                                          | 53      |                       | 0.6688 | -0.789        |
| NHBR-35NC             | 441                         |                                           | 479                        |                                          | 38      |                       | 0.861  | -0.936        |
| NHBR-2NC              | 395                         |                                           | 418                        |                                          | 23      |                       | 0.8566 | -1.507        |

<sup>a)</sup> Experimental data derived from previous works.<sup>9</sup>

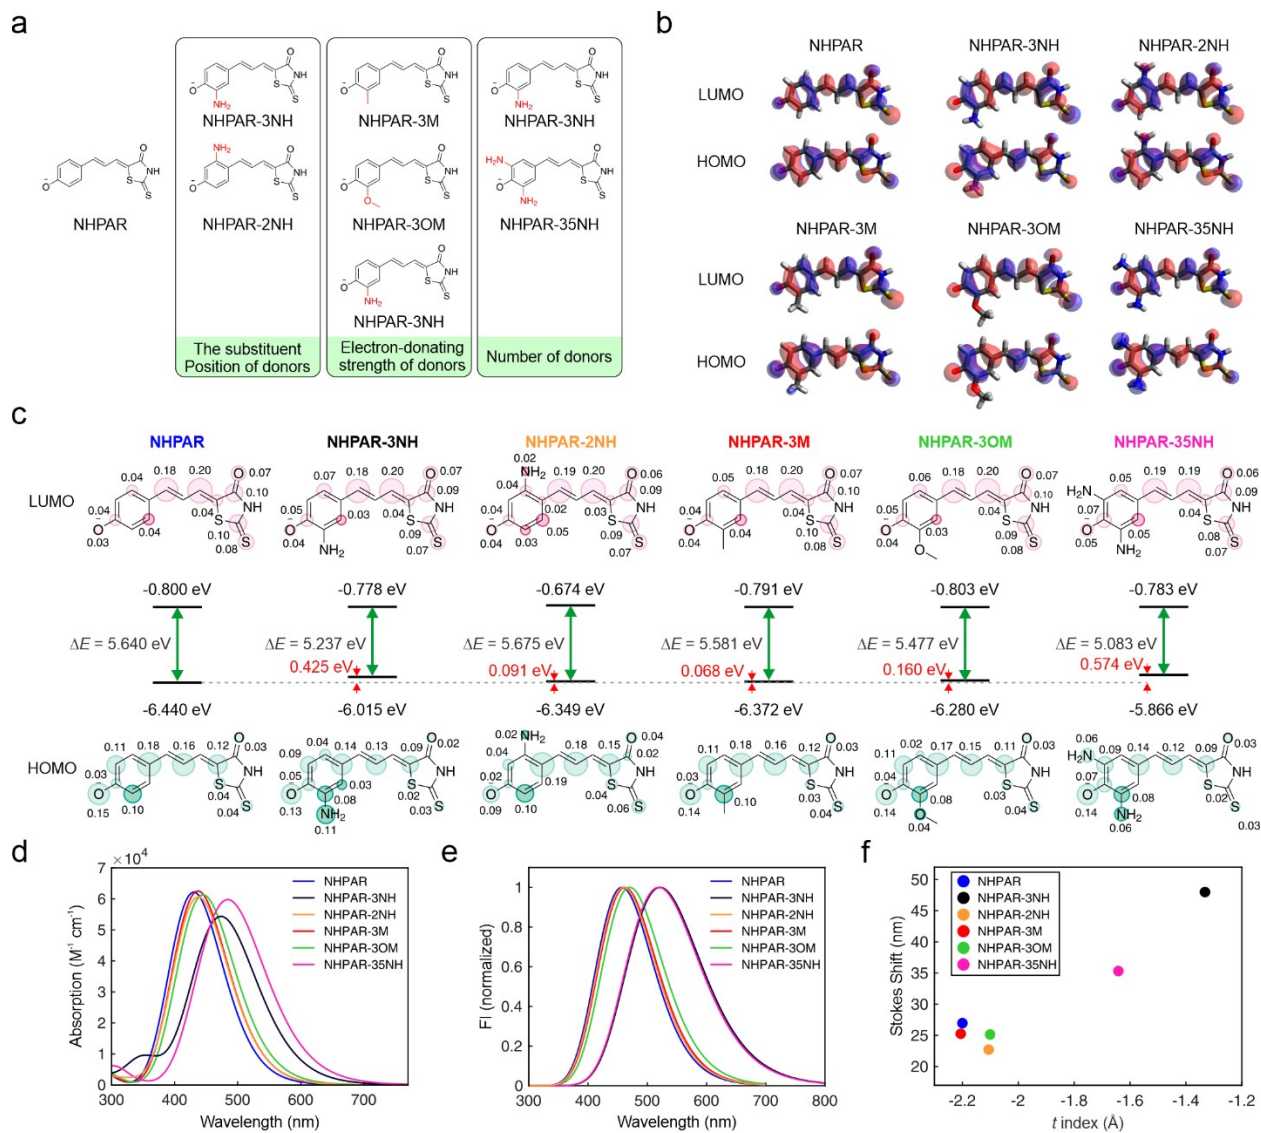

Fig. S10 (a) Chemical structures and (b) atomic contributions to the charge density distributions in the LUMO and HOMO and (c) the energy levels of HOMO and LUMO and the corresponding electronic gaps ( $\Delta E$ ), calculated (d) UV-vis absorption, (e) normalized emission spectra, and (f) the Stokes shifts as a function of the  $t$  index in the HPAR analogues in water.

Table S9. Calculated/experimental peak UV-vis absorption wavelength ( $\lambda_{\text{abs}}$ ), peak emission wavelength ( $\lambda_{\text{em}}$ ), Stokes shift ( $\Delta\lambda$ ), oscillator strength ( $f$ ), and  $t$ -index of the HPAR fluorophore analogues in water.

| Fluorophore analogues | $\lambda_{\text{abs}}$ (nm) | $\lambda_{\text{abs}}$ (nm) <sup>a)</sup> | $\lambda_{\text{em}}$ (nm) | $\lambda_{\text{em}}$ (nm) <sup>a)</sup> | SS (nm) | SS (nm) <sup>a)</sup> | $f$    | $t$ index (Å) |
|-----------------------|-----------------------------|-------------------------------------------|----------------------------|------------------------------------------|---------|-----------------------|--------|---------------|
| NHPAR                 | 430                         |                                           | 457                        |                                          | 27      |                       | 1.5313 | -2.200        |
| NHPAR-3M              | 437                         |                                           | 462                        |                                          | 25      |                       | 1.5365 | -2.206        |
| NHPAR-3OM             | 445                         | 555                                       | 470                        | 670                                      | 25      | 115                   | 1.5135 | -2.101        |
| NHPAR-3NH             | 474                         |                                           | 522                        |                                          | 48      |                       | 1.1295 | -1.332        |
| NHPAR-35NH            | 484                         |                                           | 519                        |                                          | 35      |                       | 1.4035 | -1.642        |
| NHPAR-2NH             | 437                         |                                           | 460                        |                                          | 23      |                       | 1.4497 | -2.106        |

<sup>a)</sup> Experimental data derived from previous works.<sup>10</sup>

## REFERENCES

1. T. Lu and F. Chen, *J. Comput. Chem.*, 2012, **33**, 580-592.
2. T. Le Bahers, C. Adamo and I. Ciofini, *J. Chem. Theory Comput.*, 2011, **7**, 2498-2506.
3. T. B. Ren, W. Xu, W. Zhang, X. X. Zhang, Z. Y. Wang, Z. Xiang, L. Yuan and X. B. Zhang, *J. Am. Chem. Soc.*, 2018, **140**, 7716-7722.
4. J. Qin, H. Yao, S. He and X. Zeng, *RSC Adv.*, 2016, **6**, 75570-75577.
5. X. Liu, Ph.D. Thesis, University of Cambridge, 2014.
6. H. Du, R. C. A. Fuh, J. Li, L. A. Corkan and J. S. Lindsey, *Photochem. Photobiol.*, 1998, **68**, 141-142.
7. Q. Fang, H. Tian, L. Yang, S. Chen, X. Liu and X. Song, *Sens. Actuators, B*, 2018, **260**, 146-155.
8. M. Drobizhev, N. S. Makarov, S. E. Tillo, T. E. Hughes and A. Rebane, *Nat. Methods*, 2011, **8**, 393-399.
9. C. Li, M.-A. Plamont, H. L. Sladitschek, V. Rodrigues, I. Aujard, P. Neveu, T. Le Saux, L. Jullien and A. Gautier, *Chem. Sci.*, 2017, **8**, 5598-5605.
10. C. Li, A. G. Tebo, M. Thauvin, M. A. Plamont, M. Volovitch, X. Morin, S. Vriza and A. Gautier, *Angew. Chem. Int. Ed.*, 2020, **132**, 17917-17923.
